# Supplementary material for: NLRX1 Inhibits LPS-Induced Microglial Death via Inducing p62-Dependent HO-1 Expression, Inhibiting MLKL and Activating PARP-1
Source: MDPI journal article supplement (doi:10.3390/antiox13040481), 2024-04-17
Supplement: s1 [file s1]

**Table S1.** qPCR primers.

| Gene                            | Gene Accession Number | Forward (5' to 3')                 | Reverse (3' to 5')                |
|---------------------------------|-----------------------|------------------------------------|-----------------------------------|
| <b><math>\beta</math>-actin</b> | NM_007393             | GAC TAC CTC ATG AAG AT<br>C CT     | CCA CAT CTG CTG GAA<br>GGT GG     |
| <b>NLRX1</b>                    | NM_001163743          | CCT CTG CTC TTC AAC TT<br>G CTC    | CCC ATC TGA TCC AGA<br>ACA TCG    |
| <b>iNOS</b>                     | NM_001313922          | CAG CTG GGC TGT ACA A<br>AC CTT    | CAT TGG AAG TGA AGC<br>GTT TCG    |
| <b>TNF-<math>\alpha</math></b>  | NM_013693.3           | ATG AGA AGT TCC CAA AT<br>G GCC    | TCC ACT TGG TGG TTT G<br>CT ACG   |
| <b>Keap1</b>                    | NM_001110307.1        | GAT CTA CGT CCT CGG AG<br>G CT     | TCA CTG TCC GGG TCA T<br>AG CA    |
| <b>HO-1</b>                     | NM_010442.2           | CAG AGC CGT CTC GAG C<br>AT AG     | CAA ATC CTG GGG CAT<br>GCT GT     |
| <b>Nrf2</b>                     | NM_010902.5           | CCA CAT TCC CAA ACA AG<br>A TGC C  | ATC CAG GGC AAG CGA<br>CTC AT     |
| <b>p62</b>                      | NM_001290769.1        | CCT CAG CCC TCT AGG CA<br>T TG     | TTC TGG GGT AGT GGG T<br>GT CA    |
| <b>LC3</b>                      | NM_025735.3           | GTC ACC CAG GCG AGT TA<br>C C      | TTA CAG CGG TCG GCG<br>AAG        |
| <b>MLKL</b>                     | XM_036154342.1        | TCT TTC TGG CAG AGA AC<br>G AAT CT | TCT TAC ACC TTC TTG T<br>CC GTG G |
